# Supplementary material for: Hybrid QTAIM and electrostatic potential-based quantum topology phase diagrams for water clusters
Source: Royal Society of Chemistry journal article supplement (doi:10.1039/c5cp01039j), 2015-01-01
Supplement: c5cp01039j1.pdf [file c5cp01039j1.pdf]

## ELECTRONIC SUPPLEMENTARY INFORMATION

### Hybrid QTAIM and Electrostatic Potential-Based Quantum Topology Phase Diagrams for Water Clusters

Anmol Kumar and Shridhar R. Gadre\*

*Department of Chemistry, Indian Institute of Technology, Kanpur 208016, India*

Xiao Chenxia<sup>†</sup>, Xu Tianlv<sup>†</sup>, Steven Robert Kirk<sup>†</sup> and Samantha Jenkins<sup>\*†</sup>

*National and Local United Engineering Laboratory for New Petrochemical Materials and Fine Utilization of Resources,  
Key Laboratory of Chemical Biology and Traditional Chinese Medicine Research (Ministry of Education of China),  
Key Laboratory of Resource Fine-Processing and Advanced Materials of Hunan Province, College of Chemistry and  
Chemical Engineering, Hunan Normal University, Changsha, Hunan 410081, China*

### Contents

1. Complete tabulated list of topologies and topological features for  $W_n$ ,  $n = 7-10$
2. Ratio of hydrogen bond CPs and lone pair CPs ( $b_{\text{HB}}/l$ ) and its importance
3. Table of topological features including histogram for  $W_n$ ,  $n = 12$
4. Coordinates of the most stable  $W_n$ ,  $n = 7-10$  clusters

# 1. Complete tabulated list of topologies and topological features for $W_n$ , $n = 7-10$

**Table S1.** The complete set of the critical point data for the four varying sets of critical points for the isomeric QTPDs of the heptamer molecular graphs  $W_n$ ,  $n = 7$ . The numbers of QTAIM bond, ring and cage critical points are denoted by  $b$ ,  $r$  and  $c$  respectively. The number of QTAIM hydrogen-bond BCPs are denoted by  $b_{HB}$ . The total number of BCPs is denoted  $b$  this includes the O-H sigma, H—O ( $b_{HB}$ ) and O---O BCPs. The MESP critical points, the number of negative (3,+3) LCP critical points corresponding to the oxygen lone pairs are denoted by  $l$ . The bracketed values of  $b$  indicate the numbers of O---O BCPs. The topological complexity is denoted by the sum of the numbers of bond, ring and cage critical points;  $\sum_{brc}$ . The relative energy  $\Delta E$  is listed in a.u., all the structures were optimized at the MP2/aug-cc-pvDZ level. of the critical point data for the four varying sets of critical points for the isomeric QTPD of the heptamer molecular graphs  $W_n$ ,  $n = 7$ . The selection of critical point data can be found in the main Tables 1-4.

| Molecular Graph | $b$   | $b_{HB}$ | $r$ | $c$ | $l$ | $\sum_{brc}$ | $\Delta E$ |
|-----------------|-------|----------|-----|-----|-----|--------------|------------|
| H2O-7-1         | 24    | 10       | 5   | 1   | 4   | 30           | 0          |
| H2O-7-2         | 24    | 10       | 4   | 0   | 4   | 28           | 0.0007     |
| H2O-7-3         | 24    | 10       | 5   | 1   | 4   | 30           | 0.0010     |
| H2O-7-t3        | 24    | 10       | 4   | 0   | 4   | 28           | 0.0018     |
| H2O-7-t8        | 24    | 10       | 5   | 1   | 4   | 30           | 0.0024     |
| H2O-7-t6        | 24    | 10       | 5   | 1   | 4   | 30           | 0.0025     |
| H2O-7-4         | 23    | 9        | 3   | 0   | 5   | 26           | 0.0028     |
| H2O-7-t29       | 24    | 10       | 4   | 0   | 4   | 28           | 0.0031     |
| H2O-7-t18       | 23    | 9        | 3   | 0   | 5   | 26           | 0.0034     |
| H2O-7-t21       | 23    | 9        | 3   | 0   | 5   | 26           | 0.0035     |
| H2O-7-t5        | 24(1) | 9        | 4   | 0   | 5   | 28           | 0.0039     |
| H2O-7-t12       | 23    | 9        | 3   | 0   | 5   | 26           | 0.0040     |
| H2O-7-5         | 23    | 9        | 3   | 0   | 5   | 26           | 0.0042     |
| H2O-7-t28       | 24    | 10       | 4   | 0   | 4   | 28           | 0.0043     |
| H2O-7-t7        | 24    | 10       | 5   | 1   | 5   | 30           | 0.0047     |
| H2O-7-t11       | 22    | 8        | 2   | 0   | 6   | 24           | 0.0058     |
| H2O-7-8         | 22    | 8        | 2   | 0   | 6   | 24           | 0.0058     |
| H2O-7-t20       | 23    | 9        | 4   | 1   | 5   | 28           | 0.0060     |
| H2O-7-t23       | 24    | 10       | 4   | 0   | 5   | 28           | 0.0060     |
| H2O-7-t15       | 23(1) | 8        | 3   | 0   | 6   | 26           | 0.0060     |
| H2O-7-t16       | 25    | 11       | 6   | 1   | 5   | 32           | 0.0062     |
| H2O-7-t1        | 25    | 11       | 6   | 1   | 5   | 32           | 0.0062     |
| H2O-7-t2        | 23    | 9        | 3   | 0   | 5   | 26           | 0.0062     |
| H2O-7-11        | 22    | 8        | 2   | 0   | 6   | 24           | 0.0064     |
| H2O-7-6         | 22    | 8        | 2   | 0   | 6   | 24           | 0.0064     |
| H2O-7-t13       | 23    | 9        | 3   | 0   | 5   | 26           | 0.0065     |
| H2O-7-9         | 22    | 8        | 2   | 0   | 6   | 24           | 0.0068     |
| H2O-7-10        | 22    | 8        | 2   | 0   | 6   | 24           | 0.0069     |
| H2O-7-7         | 22    | 8        | 2   | 0   | 6   | 24           | 0.0069     |
| H2O-7-t10       | 23    | 9        | 3   | 0   | 6   | 26           | 0.0074     |
| H2O-7-13        | 22    | 8        | 2   | 0   | 6   | 24           | 0.0096     |
| H2O-7-12        | 22    | 8        | 2   | 0   | 6   | 24           | 0.0096     |
| H2O-7-t9        | 23    | 9        | 3   | 0   | 5   | 26           | 0.0103     |
| H2O-7-t4        | 22    | 8        | 2   | 0   | 6   | 24           | 0.0105     |

**Table S2.** Critical point data for the isomeric QTPD of the octamer molecular graphs  $W_n$ ,  $n = 8$ . See the caption of Table S1 for further details.

| Molecular Graph | $b$   | $b_{\text{HB}}$ | $r$ | $c$ | $l$ | $\sum_{brc}$ | $\Delta E$ |
|-----------------|-------|-----------------|-----|-----|-----|--------------|------------|
| H2O-8-1         | 28    | 12              | 6   | 1   | 4   | 35           | 0          |
| H2O-8-2         | 28    | 12              | 6   | 1   | 4   | 35           | 3E-05      |
| H2O-8-t23       | 27    | 11              | 5   | 1   | 5   | 33           | 0.0088     |
| H2O-8-t2        | 27    | 11              | 5   | 1   | 5   | 33           | 0.0089     |
| H2O-8-t15       | 27    | 11              | 5   | 1   | 5   | 33           | 0.0098     |
| H2O-8-t22       | 28(1) | 11              | 5   | 0   | 5   | 33           | 0.0106     |
| H2O-8-t1        | 27    | 11              | 4   | 0   | 6   | 31           | 0.0131     |
| H2O-8-t11       | 27    | 11              | 4   | 0   | 6   | 31           | 0.0134     |
| H2O-8-t16       | 27    | 11              | 4   | 0   | 5   | 31           | 0.0147     |
| H2O-8-t17       | 26    | 10              | 3   | 0   | 6   | 29           | 0.0147     |
| H2O-8-t18       | 26    | 10              | 3   | 0   | 6   | 29           | 0.0159     |
| H2O-8-t21       | 28(2) | 10              | 6   | 1   | 6   | 35           | 0.0161     |
| H2O-8-t14       | 26    | 10              | 3   | 0   | 6   | 29           | 0.0165     |
| H2O-8-t8        | 28    | 12              | 6   | 1   | 7   | 35           | 0.0178     |
| H2O-8-t10       | 26    | 10              | 3   | 0   | 6   | 29           | 0.0180     |
| H2O-8-t7        | 28    | 12              | 5   | 0   | 8   | 33           | 0.0244     |

**Table S3.** Critical point data for the isomeric QTPD of the nonamer molecular graphs  $W_n$ ,  $n = 9$ . See the caption of Table S1 for further details.

| Molecular Graph | $b$ | $b_{\text{HB}}$ | $r$ | $c$ | $l$ | $\sum_{brc}$ | $\Delta E$ |
|-----------------|-----|-----------------|-----|-----|-----|--------------|------------|
| H2O-9-1         | 31  | 13              | 6   | 1   | 5   | 38           | 0          |
| H2O-9-2         | 31  | 13              | 6   | 1   | 5   | 38           | 0.0004     |
| H2O-9-t12       | 31  | 13              | 6   | 1   | 5   | 38           | 0.0004     |
| H2O-9-4         | 31  | 13              | 6   | 1   | 5   | 38           | 0.0006     |
| H2O-9-5         | 31  | 13              | 6   | 1   | 5   | 38           | 0.0006     |
| H2O-9-7         | 31  | 13              | 6   | 1   | 5   | 38           | 0.0009     |
| H2O-9-6         | 31  | 13              | 6   | 1   | 5   | 38           | 0.0009     |
| H2O-9-8         | 31  | 13              | 6   | 1   | 5   | 38           | 0.0012     |
| H2O-9-t4        | 31  | 13              | 6   | 1   | 5   | 38           | 0.0042     |
| H2O-9-t1        | 31  | 13              | 5   | 0   | 6   | 36           | 0.0082     |
| H2O-9-t10       | 31  | 13              | 6   | 1   | 5   | 38           | 0.0107     |
| H2O-9-t9        | 31  | 13              | 5   | 0   | 5   | 36           | 0.0110     |
| H2O-9-t3        | 31  | 13              | 5   | 0   | 5   | 36           | 0.0113     |
| H2O-9-t2        | 31  | 13              | 6   | 1   | 5   | 38           | 0.0112     |
| H2O-9-t6        | 30  | 12              | 4   | 0   | 6   | 34           | 0.0133     |
| H2O-9-t5        | 31  | 13              | 5   | 0   | 6   | 36           | 0.0163     |
| H2O-9-t11       | 29  | 11              | 3   | 0   | 7   | 32           | 0.0177     |
| H2O-9-t7        | 29  | 11              | 3   | 0   | 7   | 32           | 0.0194     |

**Table S4.** Critical point data for the isomeric QTPD of the decamer molecular graphs  $W_n$ ,  $n = 10$ . See the caption of Table S1 for further details.

| Molecular Graph | $b$ | $b_{\text{HB}}$ | $r$ | $c$ | $l$ | $\sum_{brc}$ | $\Delta E$ |
|-----------------|-----|-----------------|-----|-----|-----|--------------|------------|
| H2O-10-1        | 35  | 15              | 7   | 1   | 5   | 43           | 0          |
| H2O-10-2        | 35  | 15              | 7   | 1   | 5   | 43           | 0.0002     |
| H2O-10-3        | 35  | 15              | 7   | 1   | 5   | 43           | 0.0011     |
| H2O-10-4        | 35  | 15              | 7   | 1   | 5   | 43           | 0.0011     |
| H2O-10-5        | 35  | 15              | 7   | 1   | 5   | 43           | 0.0012     |
| H2O-10-6        | 35  | 15              | 7   | 1   | 5   | 43           | 0.0025     |
| H2O-10-8        | 35  | 15              | 7   | 1   | 5   | 43           | 0.0026     |
| H2O-10-7        | 35  | 15              | 7   | 1   | 5   | 43           | 0.0026     |
| H2O-10-t8       | 35  | 15              | 7   | 1   | 5   | 43           | 0.0033     |
| H2O-10-12       | 35  | 15              | 7   | 1   | 5   | 43           | 0.0034     |
| H2O-10-9        | 35  | 15              | 7   | 1   | 5   | 43           | 0.0034     |
| H2O-10-10       | 35  | 15              | 7   | 1   | 5   | 43           | 0.0034     |
| H2O-10-14       | 35  | 15              | 7   | 1   | 5   | 43           | 0.0038     |
| H2O-10-15       | 35  | 15              | 7   | 1   | 5   | 43           | 0.0038     |
| H2O-10-20       | 35  | 15              | 7   | 1   | 5   | 43           | 0.0041     |
| H2O-10-16       | 34  | 14              | 6   | 1   | 6   | 41           | 0.0042     |
| H2O-10-25       | 35  | 15              | 7   | 1   | 5   | 43           | 0.0043     |
| H2O-10-17       | 34  | 14              | 6   | 1   | 6   | 41           | 0.0044     |
| H2O-10-19       | 34  | 14              | 6   | 1   | 6   | 41           | 0.0044     |
| H2O-10-18       | 34  | 14              | 6   | 1   | 6   | 41           | 0.0045     |
| H2O-10-21       | 34  | 14              | 6   | 1   | 6   | 41           | 0.0049     |
| H2O-10-22       | 34  | 14              | 6   | 1   | 6   | 41           | 0.0049     |
| H2O-10-t24      | 35  | 15              | 7   | 1   | 6   | 43           | 0.0053     |
| H2O-10-27       | 34  | 14              | 6   | 1   | 6   | 41           | 0.0054     |
| H2O-10-E18      | 35  | 15              | 8   | 2   | 6   | 45           | 0.0058     |
| H2O-10-t26      | 34  | 14              | 5   | 0   | 6   | 39           | 0.0059     |
| H2O-10-t5       | 35  | 15              | 7   | 1   | 5   | 43           | 0.0061     |
| H2O-10-E15      | 35  | 15              | 7   | 1   | 6   | 43           | 0.0062     |
| H2O-10-E8       | 35  | 15              | 7   | 1   | 7   | 43           | 0.0065     |
| H2O-10-E11      | 35  | 15              | 7   | 1   | 7   | 43           | 0.0070     |
| H2O-10-E1       | 35  | 15              | 7   | 1   | 6   | 43           | 0.0070     |
| H2O-10-29       | 34  | 14              | 5   | 0   | 6   | 39           | 0.0072     |
| H2O-10-28       | 34  | 14              | 6   | 1   | 6   | 41           | 0.0072     |
| H2O-10-E2       | 35  | 15              | 7   | 1   | 7   | 43           | 0.0073     |
| H2O-10-30       | 34  | 14              | 6   | 1   | 6   | 41           | 0.0075     |
| H2O-10-E16      | 35  | 15              | 7   | 1   | 6   | 43           | 0.0082     |
| H2O-10-t9       | 36  | 16              | 8   | 1   | 6   | 45           | 0.0088     |
| H2O-10-E7       | 35  | 15              | 7   | 1   | 7   | 43           | 0.0089     |
| H2O-10-t14      | 34  | 14              | 6   | 1   | 6   | 41           | 0.0089     |
| H2O-10-t11      | 34  | 14              | 6   | 1   | 6   | 41           | 0.0090     |

|                  |       |                 |     |     |     |              |            |
|------------------|-------|-----------------|-----|-----|-----|--------------|------------|
| H2O-10-t12       | 35    | 15              | 7   | 1   | 5   | 43           | 0.0096     |
| H2O-10-E17       | 34    | 14              | 6   | 1   | 6   | 41           | 0.0099     |
| Molecular Graphs | $b$   | $b_{\text{HB}}$ | $r$ | $c$ | $l$ | $\sum_{brc}$ | $\Delta E$ |
| H2O-10-t25       | 34    | 14              | 5   | 0   | 6   | 39           | 0.0118     |
| H2O-10-t10       | 36(1) | 15              | 8   | 1   | 5   | 45           | 0.0122     |
| H2O-10-t15       | 34    | 14              | 6   | 1   | 6   | 41           | 0.0137     |
| H2O-10-t7        | 35    | 15              | 7   | 1   | 6   | 43           | 0.0148     |
| H2O-10-t17       | 34    | 14              | 5   | 0   | 6   | 39           | 0.0165     |
| H2O-10-t27       | 36    | 16              | 7   | 0   | 6   | 43           | 0.0169     |
| H2O-10-t23       | 37(2) | 15              | 9   | 1   | 5   | 47           | 0.0170     |
| H2O-10-t22       | 35    | 15              | 7   | 1   | 5   | 43           | 0.0181     |
| H2O-10-t16       | 35    | 15              | 6   | 0   | 8   | 41           | 0.0182     |
| H2O-10-t13       | 36(1) | 15              | 8   | 1   | 7   | 45           | 0.0193     |
| H2O-10-t28       | 33    | 13              | 4   | 0   | 8   | 37           | 0.0205     |
| H2O-10-t18       | 33    | 13              | 4   | 0   | 7   | 37           | 0.0208     |

## 2. Ratio of hydrogen-bond $BCPs$ and lone pair $CPs$ ( $b_{\text{HB}}/l$ )

The use of ratio of hydrogen bonds to lone pairs in water clusters have been briefly mentioned in main article. Here we express this result, with the help of Table S5 where the value of ( $b_{\text{HB}}/l$ ) may be seen to be maximum for each of the structures that correspond to global energy minimum. The results from Table S5 of the  $W_n$ ,  $n = 7-10$  hybrid topologies also reflect the pattern of higher  $b_{\text{HB}}/l$  values, including that of GM for even number water cluster  $n = 8, 10$  in contrast with the odd numbered ones,  $n = 7, 9$ . This implies even-numbered water clusters could allow better utilization of the  $LCPs$  in hydrogen-bonding, thus increasing the value of  $b_{\text{HB}}/l$  and increasing the overall relative energetic stability  $\Delta E$ , see Tables S1-S4. This is in agreement with the literature where extra energetic stability has been reported amongst water clusters containing an even number of water monomers compared with those containing an odd number.

**Table S5.** The hybrid topologies expressed as the number of hydrogen-bond  $BCPs$  ( $b_{\text{HB}}$ ) from the QTAIM analysis and the numbers ( $l$ ) of negative MESP (3,+3)  $LCPs$  for the  $W_n$ ,  $n = 7-10$ . The value of the ratio ( $b_{\text{HB}}/l$ ) corresponding to the global minimum of each hybrid-QTPD are indicated in a bold font, see Figure 5.

|             |                                       |                                |
|-------------|---------------------------------------|--------------------------------|
| Hybrid QTPD | $b_{\text{HB}}$ $W_n$ , $n = 7-10$    | $b_{\text{HB}}/l$              |
| $W_7$       | $n + 1, n + 2, \mathbf{n + 3}, n + 4$ | 1.33, 1.78, <b>2.50</b> , 2.38 |
| $W_8$       | $n + 2, n + 3, \mathbf{n + 4}$        | 1.66, 2.22, <b>3.00</b>        |
| $W_9$       | $n + 2, n + 3, \mathbf{n + 4}$        | 1.56, 2.00, <b>2.63</b>        |
| $W_{10}$    | $n + 3, n + 4, \mathbf{n + 5}, n + 6$ | 1.85, 2.32, <b>3.00</b> , 2.63 |

### 3. Table of topological features including histogram for $W_n$ , $n = 12$

**Table S6:**  $W_n$ ,  $n = 12$  clusters are arranged in order of decreasing energetic stability using MP2/3-21G (opt) energies. The number of hydrogen-bond BCPs ( $b_{HB}$ ), lone pairs LCPs ( $l$ ) and histograms of negative (3,+3) MESP critical points are provided. The x-axis of the histogram represents the negative valued (3,+3) critical points and the y-axis represents their count. The left hand side of x-axis starts with a value of 0 a.u. and stretches up to -0.14 a.u. (-0.16 a.u. in few cases), partitioned into the smaller segments of size 0.02 a.u. All the accounted critical points are negative valued although negative sign is not carried off in the histogram. The MP2/aug-cc-pvDZ energies belong to the structures which are successfully optimized starting with MP2/3-21G geometries.

| Rank | Molecule | $b_{HB}$ | $l$ | Histogram                                                                           | MP2/3-21G (opt) | MP2/aug-cc-pvDZ (opt) |
|------|----------|----------|-----|-------------------------------------------------------------------------------------|-----------------|-----------------------|
| 1    | W12-10   | 20       | 4   | 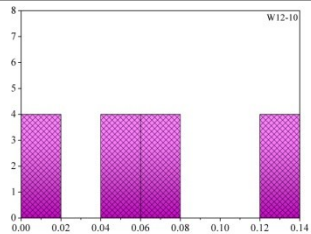   | -908.9903133    | -915.3306569          |
| 2    | W12-1    | 18       | 6   |   | -908.9621305    | -915.3196938          |
| 3    | W12-11   | 20       | 6   |  | -908.9582291    | -915.3163258          |
| 4    | W12-19   | 18       | 4   |  | -908.9560104    | -915.3173443          |
| 5    | W12-3    | 19       | 5   |  | -908.9535198    | -NC-                  |

|    |        |    |   |               |              |              |
|----|--------|----|---|---------------|--------------|--------------|
| 6  | W12-7  | 18 | 5 | <p>W12-7</p>  | -908.95285   | -915.3155026 |
| 7  | W12-9  | 19 | 5 | <p>W12-9</p>  | -908.9487784 | -915.3120727 |
| 8  | W12-15 | 20 | 5 | <p>W12-15</p> | -908.9485384 | -915.3126055 |
| 9  | W12-14 | 19 | 3 | <p>W12-14</p> | -908.9478547 | -915.3149325 |
| 10 | W12-20 | 20 | 3 | <p>W12-20</p> | -908.9405999 | -NC-         |
| 11 | W12-6  | 18 | 4 | <p>W12-6</p>  | -908.937249  | -NC-         |
| 12 | W12-17 | 19 | 6 | <p>W12-17</p> | -908.9278839 | -915.3041912 |

|    |        |    |   |  |              |      |
|----|--------|----|---|--|--------------|------|
| 13 | W12-5  | 18 | 5 |  | -908.9259688 | -NC- |
| 14 | W12-12 | 20 | 2 |  | -908.9202275 | -NC- |

#### 4. Coordinates of some of the most stable $W_n$ , $n = 7-10$ cluster ( $H_2O$ )<sub>7</sub>

##### H2O-7-1

O 1.0958991846 -1.2898738996 -1.3823317062  
H 0.2880513219 -1.5745548180 -0.8627933679  
H 1.2721231991 -2.0016908551 -2.0091729557  
O 2.4704778884 0.0051103004 0.7217089558  
H 2.2177830677 -0.6108896459 0.0056257004  
H 2.4381927845 0.8626282645 0.2691618203  
O 0.2004444154 -0.1647001125 2.2040900666  
H 1.1018322829 -0.1042056082 1.8006749394  
H 0.3421194263 -0.2160001167 3.1571320425  
O -0.9658824724 -1.8490803435 0.1755725132  
H -0.6926158543 -1.4332105111 1.0143158752  
H -1.7365529340 -1.3113341008 -0.1112346088  
O -1.0521594782 1.7740615360 0.4578616351  
H -0.3338352257 1.7926632382 -0.2037735155  
H -0.6757424503 1.2521424981 1.1902630930  
O -2.8183564137 0.0259461020 -0.6705454535  
H -3.7319958833 0.1735627133 -0.3987181303  
H -2.2991826732 0.7602356578 -0.2619745201  
O 1.0728196798 1.4751293134 -1.4605595132  
H 1.0079975782 1.9416319467 -2.3031393738  
H 1.0110519787 0.5214994396 -1.6835145303

##### H2O-7-2

O -0.9401233410 -1.3217030221 -1.5488870226  
H -1.6889620132 -1.2534927150 -0.9305999180  
H -0.2260184326 -1.6911048582 -0.9977835948  
O -1.0704304975 1.4677971128 -1.3163989462  
H -0.8760463369 0.5542947000 -1.6227040897



H -1.8542257667 1.3026731838 -0.7622030965  
O -0.3658045649 -0.1556426767 1.9509623682  
H 0.1658553197 -0.8757787214 1.5613020448  
H 0.1046138669 0.6466398924 1.6585798941  
O 2.8190917266 0.1155268141 -0.3518217562  
H 2.2263899451 0.8677140178 -0.1275866176  
H 3.0585559044 0.2557968536 -1.2766522525  
O 0.8976189301 1.9445452051 0.4025828240  
H 1.0401255324 2.8895678966 0.5370287894  
H 0.1593920610 1.8691648426 -0.2674853863  
O 1.1793405412 -1.9437252714 0.3155088191  
H 1.8799456278 -1.3017272054 0.0459979024  
H 1.6438489330 -2.7585968662 0.5421247399  
O -2.6551504188 -0.1222889961 0.4865417730  
H -1.9042002977 -0.1477228692 1.1310445551  
H -3.4548167033 -0.2421973205 1.0125189904

### H2O-7-3

O -0.9430556709 -1.8448817718 0.0178870617  
H -0.7217480144 -1.4596170009 0.8864748065  
H -1.7281669722 -1.3293017110 -0.2652278759  
O 1.2158637887 1.5030226113 -1.3883203099  
H 1.1754610792 0.5584729301 -1.6511563258  
H 1.2915548205 2.0000115005 -2.2121000797  
O 2.4491096953 -0.0315075267 0.8403363448  
H 2.2402658404 -0.6313455745 0.0974746906  
H 2.4378803847 0.8352720445 0.4043199277  
O 0.0766366573 -0.2159174629 2.1587911817  
H 0.1404914901 -0.2988071712 3.1180133975  
H 1.0068812894 -0.1544021576 1.8296922733  
O -1.0509064923 1.7847572772 0.3851179506  
H -0.2956895086 1.7913658226 -0.2326719988  
H -0.7280123829 1.2518471166 1.1351294542  
O 1.2028624752 -1.2560687710 -1.3989163910  
H 0.3608303776 -1.5404600654 -0.9348114122  
H 1.4227766439 -1.9697621626 -2.0096092147  
O -2.9333571976 0.0125371143 -0.5005854143  
H -3.4972451085 0.3208425796 -1.2188393365  
H -2.3506531353 0.7728823802 -0.2648488141

### H2O-7-t3

O -1.6261227758 3.1166306362 -2.1961096821  
H -2.0841074123 3.2169164243 -1.3414982359  
H -2.3557200287 3.0015956675 -2.8297863089  
O -3.6736277280 1.7017373733 -3.7422691135  
H -4.3420119317 1.7910921797 -4.4319941254  
H -4.1692808204 1.4780710044 -2.9157285836  
O -3.1777051045 3.0007325106 0.2533182540  
H -2.7329812371 2.3495168489 0.8463094701  
H -3.3918444255 3.7592382192 0.8099531039  
O -1.9578753811 0.9154581460 1.5031182707  
H -2.1023178514 0.2212976768 0.8215143991  
H -2.2408073846 0.5155556937 2.3344944170  
O -4.6803351086 1.0918237578 -1.2888977157

|   |               |               |               |
|---|---------------|---------------|---------------|
| H | -4.1312524658 | 0.3333052627  | -1.0165898186 |
| H | -4.3597560809 | 1.8154363705  | -0.7181128948 |
| O | -1.3149415603 | 0.3872855342  | -2.7327310632 |
| H | -1.1461020556 | 1.3122132653  | -2.4466522120 |
| H | -2.0328863143 | 0.5308566300  | -3.3752551685 |
| O | -2.5198078075 | -0.7251879205 | -0.6496740307 |
| H | -2.3956868760 | -1.6821942066 | -0.6673467040 |
| H | -2.0098321042 | -0.3763789472 | -1.4380641989 |

#### H2O-7-t8

|   |               |               |               |
|---|---------------|---------------|---------------|
| O | 1.3351384567  | -1.7168646934 | -0.4366468530 |
| H | 0.9238980257  | -0.8369410378 | -0.5124433594 |
| H | 0.6362010457  | -2.2554957416 | -0.0253718013 |
| O | -1.2997540886 | -0.4241912657 | 4.3482942446  |
| H | -0.4680278233 | -0.9306437603 | 4.2481547740  |
| H | -1.0883720404 | 0.2937362281  | 4.9574366266  |
| O | 2.3368356030  | -0.5550810257 | 1.8963055552  |
| H | 2.2419272030  | -1.0898001787 | 1.0767747982  |
| H | 1.8351883135  | 0.2411935851  | 1.6416666960  |
| O | 0.3718774575  | 0.9149815584  | 0.4081460427  |
| H | 0.1565121413  | 1.7613542070  | -0.0016703029 |
| H | -0.4712686159 | 0.5984608546  | 0.8247886198  |
| O | 0.8828064439  | -1.9961105064 | 3.5651715332  |
| H | 1.4892453282  | -1.4330058889 | 2.9977146921  |
| H | 1.4675542469  | -2.4945461821 | 4.1498974123  |
| O | -0.6256248933 | -2.8955918229 | 1.3988042002  |
| H | -0.1169585614 | -2.7816593632 | 2.2309258673  |
| H | -1.0525863760 | -3.7582109750 | 1.4709942377  |
| O | -1.7683229369 | -0.2384121988 | 1.5684565370  |
| H | -1.6048583490 | -1.1857692033 | 1.4105286460  |
| H | -1.7334073140 | -0.1714031918 | 2.5440738705  |

#### (H<sub>2</sub>O)<sub>8</sub>

##### H2O-8-1

|   |               |               |               |
|---|---------------|---------------|---------------|
| H | 2.1562222484  | 0.1988412771  | 0.3524763209  |
| O | 1.9275988805  | 0.1855327133  | -1.3298385561 |
| H | 1.2890949454  | 0.9002393629  | -1.5196099421 |
| H | 1.4316179099  | -0.6327872862 | -1.5269499850 |
| O | -0.1991614913 | 2.0747136906  | -1.3446437131 |
| O | 0.1856081597  | -2.0632274116 | -1.3641096252 |
| O | 2.0758651644  | 0.1868529523  | 1.3448037416  |
| H | -1.4468347350 | 0.6456680002  | -1.5069972563 |
| H | -0.2022330689 | 2.1558128081  | -0.3523084251 |
| H | -0.2842906052 | 2.9727124747  | -1.6871791568 |
| H | 0.2672405238  | -2.9582910453 | -1.7150751800 |
| H | -1.3042741513 | -0.8873711216 | -1.5140664135 |
| H | 0.1986613791  | -2.1527237994 | -0.3725783766 |
| H | 2.9741279974  | 0.2688121368  | 1.6874206945  |
| H | 0.9013704898  | -1.3029036828 | 1.5070433265  |
| H | 0.6469297704  | 1.4328092043  | 1.5197991705  |
| O | 0.1865704690  | -1.9396399595 | 1.3117852456  |
| H | -2.1525731480 | -0.2018715540 | 0.3725142048  |
| H | -0.8860986091 | 1.2901043933  | 1.5270237100  |

O -0.1732827500 1.9285153096 1.3299847095  
H -0.6316620649 -1.4455822307 1.5140341231  
O -2.0622496137 -0.1982588197 1.3640510029  
O -1.9408092825 -0.1743294541 -1.3118275004  
H -2.9570284230 -0.2831369523 1.7149718846

#### H2O-8-2

H -1.3490865106 -0.8137355835 1.5326065141  
O -0.0627102875 -1.8997315757 1.3653619390  
H 0.7509425539 -1.3817324235 1.5204375435  
H 0.2745467058 -2.7061660372 -2.1007312563  
O 2.0019963333 0.0637472373 1.4756559612  
O -2.0020047048 -0.0637678604 1.4756549716  
H -2.7061742818 -0.2745526363 2.1007385007  
H -2.1384609909 0.0081017853 -0.4193274669  
H -0.7509518251 1.3817049698 1.5203952199  
O 0.0627014407 1.8997083502 1.3653255528  
H 0.0080794291 2.1384782156 0.4193107693  
H 1.3490868811 0.8137154801 1.5325904642  
O 1.8996961897 -0.0627007406 -1.3653355172  
O -1.8996987350 0.0627243223 -1.3653424759  
H -1.3817003554 -0.7509337060 -1.5204103279  
H -0.2745313173 2.7061917235 -2.1007526350  
O 0.0637539515 -2.0020085625 -1.4756351274  
H -0.0080893849 -2.1384908576 0.4193465062  
H 0.8137151573 -1.3490815681 -1.5325924115  
H 2.1384500051 -0.0080846191 -0.4193185529  
H 2.7062036141 0.2745262504 2.1006935418  
O -0.0637513670 2.0020271102 -1.4756632585  
H -0.8137134110 1.3491023807 -1.5326072126  
H 1.3817009004 0.7509583498 -1.5204082377

#### H2O-8-t23

H -3.3636854964 -1.3745548644 -1.0240110321  
O -2.4760429175 -0.1431918387 -3.6696753455  
H -2.7570528275 0.4499452884 -4.3773055829  
H -1.9456469309 0.4150287940 -3.0644480020  
O -3.0579946854 2.8175767557 -0.6947372571  
O -1.2051738738 1.1456794864 -1.5369598225  
O -4.1100771948 -1.1424818852 -1.6060651218  
H -1.4043108768 -0.2807075646 -0.4419278938  
H -3.8869307425 2.3052369530 -0.6170682295  
H -2.8247976597 3.0269437128 0.2362457582  
H -1.8797734706 1.8208174099 -1.2182637715  
H -1.0530764524 -1.6304322260 0.2434917569  
H -0.3649115523 1.6212407717 -1.5581711993  
H -3.6647591248 -0.8624948537 -2.4324336956  
H -2.5017930370 3.4326610785 2.7001131332  
H -4.8641630880 0.1515312351 -0.8306314881  
O -2.2505501569 2.8853601490 1.9466338730  
H -2.8257046377 -0.1617777333 1.5045854463  
H -6.1063123277 0.9688399858 -0.3468441308  
O -5.1444679963 0.9324230553 -0.2798773559  
H -2.6635345708 2.0030429506 2.1121704544  
O -3.4353236285 0.4297411069 1.9829186097  
O -1.7814807598 -1.0151140385 0.0939634196

H -4.1634413124 0.5566886715 1.3452956012

#### H2O-8-t2

H 2.1407756174 1.1970607769 -1.3177389818  
O 1.3110125992 -1.0121069147 0.4007413819  
H 1.9652180911 -0.5908430041 -0.2133304259  
H 1.7252497662 -1.8301377453 0.7009618262  
O 0.8554960506 2.3004429988 -1.0803701872  
O -1.4991803453 1.2899951870 -2.4042134296  
O 2.7665210573 0.4258642797 -1.3469692989  
H -1.3208113796 -0.3414541102 -1.4066089613  
H 0.5541564895 2.1112371498 -0.1644640402  
H 0.1062355194 2.0272609591 -1.6410011498  
H -1.7756864859 1.3751140936 -3.3247722569  
H -0.3962246186 -1.0571784862 -0.3872431212  
H -2.1493376312 1.8139191135 -1.8753829240  
H 3.6393858165 0.8029954021 -1.1826632186  
H -2.6803080503 3.3842456201 -0.2556802118  
H 0.6175871460 0.5487516795 1.3795718299  
O -3.0739088233 2.5730798112 -0.6031108038  
H -2.1678418484 -0.1244837005 0.5447658000  
H -0.7474789142 1.1895563079 1.6239455712  
O 0.1911542764 1.4166406432 1.5007666916  
H -3.0006345863 1.9246647620 0.1315184368  
O -2.5494612601 0.5338501487 1.1902706020  
O -1.3333822762 -0.9575685528 -0.6492861809  
H -3.1865379671 0.0460960214 1.7262933884

#### H2O-8-t15

H -5.4825172870 2.6824888956 1.3719557468  
O -3.5696507117 -0.2485459542 2.1710582247  
H -4.1957018784 0.4759594314 1.9884411934  
H -4.0868835411 -1.0664434115 2.0107990698  
O -4.9494099497 -2.4866714849 1.2317408736  
O -4.0298204692 -1.6028952178 -1.1982117057  
O -5.1018596073 1.8882210075 0.9766861445  
H -6.9755245362 0.0934583146 -1.0451270036  
H -4.6066478117 -2.3491517378 0.3170754705  
H -4.7968307600 -3.4185274686 1.4287335605  
H -3.2181772208 -1.1305411329 -0.9320526207  
H -5.9048105214 0.9476583647 -0.3090147966  
H -4.7056921764 -0.9016269080 -1.2568688394  
H -4.3373461071 2.2044326348 0.4115660417  
H -2.5095196281 1.6259531692 -0.4986327133  
H -2.4336576137 -0.1585187809 0.9250486158  
O -3.0819324416 2.4042453919 -0.6506507385  
H -5.1999959832 1.3274660745 -2.5468618938  
H -1.0184443097 -0.2885176466 0.2654883232  
O -1.9365883584 -0.0692539198 0.0650727549  
H -3.4353859868 2.2797681019 -1.5554960125  
O -4.5257033515 1.8613681884 -3.0094538226  
O -6.0768836167 0.4348086310 -1.1328881875  
H -4.1970247686 1.2878669102 -3.7134060506

(H<sub>2</sub>O)<sub>9</sub>

## H2O-9-1

O -0.4054400308 1.0767620821 -1.9864131534  
H 0.3331510255 1.4601291122 -1.4735391146  
H -1.1995790891 1.3072111009 -1.4667251108  
O -0.3709060283 -1.1006420839 2.1761891644  
H -0.3412930260 -0.1075660081 2.1107941596  
H -0.3714660285 -1.3049720991 3.1191832391  
O -2.3690201791 -1.3724131042 0.1697110131  
H -1.8033441359 -1.6407951252 -0.5805560418  
H -1.7817691350 -1.4565341095 0.9461130718  
O -0.4079120310 -1.5987761232 -1.8754211412  
H -0.3988060304 -1.9987071527 -2.7534942110  
H -0.3631670280 -0.6153050479 -2.0220641527  
O 1.6086221221 2.0522251551 -0.2167140165  
H 2.0631201579 2.8868642189 -0.3845160295  
H 2.3251561795 1.3677031038 -0.1518680114  
O -2.5423801964 1.2802741004 -0.1224100094  
H -3.4484792660 1.6090531211 -0.1624740126  
H -2.6109271978 0.2923650224 -0.0142400011  
O 3.3175982539 -0.0026830002 -0.1160450088  
H 4.0308013098 -0.1349870100 0.5197860398  
H 2.6987222067 -0.7681560601 0.0213060016  
O -0.4015440305 1.5377481167 1.7273301313  
H -1.1979590923 1.6347171223 1.1699680871  
H 0.3329260257 1.8072631380 1.1414810893  
O 1.4948821136 -1.9453511473 0.2042910154  
H 0.9010860677 -1.9451111496 -0.5718510443  
H 0.9029800671 -1.7402171319 0.9538660742

## H2O-9-2

O -0.4700290949 1.4727375698 1.7857040070  
H -1.2693902738 1.5678192542 1.2319680600  
H 0.2481791418 1.8013673308 1.2110835136  
O 3.3535904667 0.0942277320 0.0086929332  
H 2.7792256611 0.8873195374 -0.0513563946  
H 3.9582538872 0.2731814883 0.7390504329  
O 1.4770258741 -1.9667873821 0.0956084396  
H 0.9565603378 -1.7680844578 0.8978287277  
H 2.2005185594 -1.3048337192 0.1016172869  
O 1.4513148449 2.1175326921 -0.2395805502  
H 0.8069708832 1.7893069580 -0.9305373904  
H 1.7018880353 3.0034383261 -0.5307005386  
O -0.3855552924 1.1889738584 -1.9143739790  
H -0.3094773451 0.2223114909 -2.0502703479  
H -1.2342919154 1.2930687278 -1.4420984187  
O -0.2547996217 -1.6282753894 -1.8782687868  
H -0.1091585242 -2.2569295209 -2.5956961960  
H 0.4638347085 -1.8079321133 -1.2071321418  
O -2.3112958050 -1.4214760215 0.0708450139  
H -1.7370541443 -1.5243991179 0.8546032228  
H -1.7216708399 -1.6466118733 -0.6760561519  
O -0.3484061329 -1.1850337422 2.1277691921  
H -0.3516190739 -0.1905138947 2.0968298229  
H -0.3579161673 -1.4193019497 3.0637887794  
O -2.5816012001 1.2248915049 -0.1058888739  
H -3.4976188717 1.5214067158 -0.1677595900

H -2.6170581025 0.2311360306 -0.0377090414

#### H2O-9-4

O 3.3360485161 0.1268603265 -0.2545654020  
H 2.7449843529 -0.6637597078 -0.1424068540  
H 4.0773587528 -0.0225933732 0.3442384689  
O -2.5204759149 1.3260386718 -0.0320248816  
H -3.2431284255 1.9241713624 -0.2576259690  
H -1.8755022535 1.3713533526 -0.7904699671  
O 1.5333594804 2.0982272689 -0.1448568881  
H 2.2859856646 1.4506953847 -0.1537392107  
H 1.9364059404 2.9623569628 -0.2943031426  
O -0.5258932988 -1.6114658783 -1.8787243926  
H -1.2476578743 -1.6648045373 -1.1950800559  
H -0.7739513765 -2.2319907412 -2.5749920991  
O -0.5809597776 1.2350297419 -1.8592506433  
H -0.4525486595 0.2819783282 -2.0328677984  
H 0.2268343239 1.5207709622 -1.3890885588  
O -0.2358671949 -1.2520119924 2.1202554361  
H -0.2471776511 -0.2561136238 2.1197271002  
H -0.1991884777 -1.5159687104 3.0476488310  
O -2.2733942307 -1.5026435775 0.1470106421  
H -2.5683311334 -0.5712521585 0.1440993380  
H -1.6969185053 -1.5566399403 0.9341432148  
O 1.5822183576 -1.8828173140 0.0239149957  
H 1.0134073043 -1.7506393731 0.8072605284  
H 0.9516133190 -1.9015975553 -0.7215778098  
O -0.3816454229 1.4016543700 1.8442701487  
H -1.1984203126 1.5247164602 1.3226302782  
H 0.3229744988 1.7291453257 1.2511647055

#### H2O-9-7

O 3.3336794319 0.2620525727 -0.2321379807  
H 2.7299252279 1.0311105270 -0.1523847869  
H 4.0491017726 0.4347676785 0.3918476813  
O 1.6026406676 -1.9007484533 0.0219208137  
H 2.2763483891 -1.1890403125 -0.0184731375  
H 1.1230357696 -1.7508729414 0.8585199017  
O -2.1807519952 -1.5499544525 0.2698421465  
H -2.5203295921 -0.6419309240 0.1479835239  
H -1.6761630518 -1.7173555635 -0.5507742373  
O 1.3346322246 2.1847847809 -0.1128641090  
H 1.5045036514 3.1330946898 -0.0503207142  
H 0.7166609330 1.9739958081 0.6419584518  
O -0.2597068739 -1.3185698535 2.1130213926  
H -1.0302948850 -1.4883753872 1.5039543390  
H -0.4374313885 -1.8335136792 2.9098365759  
O -2.5679618735 1.2371503086 -0.0957974897  
H -1.9289936382 1.2768848154 -0.8599641693  
H -3.3316708655 1.7664338217 -0.3554375365  
O -0.2772513910 -1.6567700973 -1.8331635914  
H 0.4881485880 -1.7982879743 -1.2068456346  
H -0.1341758094 -2.2691831969 -2.5650536529  
O -0.4287437300 1.4949213521 1.7629726691  
H -1.2805393558 1.4972223577 1.2845615685  
H -0.3204914499 0.5630559702 2.0401363019

O -0.6417386475 1.1399517353 -1.9368941329  
H 0.1388001533 1.5161230873 -1.4878846335  
H -0.4379622744 0.1878533756 -2.0396195286

#### H2O-9-8

O 2.5544237361 1.2787515781 0.0326439537  
H 1.9004447162 1.4104685156 0.7724281715  
H 3.3048646670 1.8514784636 0.2315289786  
O 0.4375491336 1.2540801282 -1.8721309287  
H 1.2828177866 1.3269996418 -1.3883218180  
H 0.3552268324 0.2976414339 -2.0592081357  
O 2.2181020293 -1.5403740635 -0.0210033777  
H 1.6763868091 -1.6061082127 0.7902645458  
H 2.5428960543 -0.6192120165 -0.0017631497  
O 0.5812999168 1.3985137665 1.8306111684  
H 0.3782382051 0.4598788260 2.0204350277  
H -0.1823554828 1.7189762112 1.3139530255  
O -1.3694820231 2.1639284874 -0.1421878006  
H -1.5816231073 3.0732811609 -0.3882132629  
H -0.7377395233 1.8458680629 -0.8476295345  
O 0.3563195993 -1.5838764922 -1.9428557855  
H 1.1117678239 -1.6628576307 -1.2986670686  
H 0.5711024966 -2.1736160294 -2.6760244292  
O 0.2237935603 -1.3985450515 1.9984190951  
H 0.0727697210 -1.9477369429 2.7773869660  
H -0.5113711855 -1.6244719174 1.3597024889  
O -1.5796598332 -1.9040303154 0.1248322955  
H -1.0763897212 -1.8735223950 -0.7109257628  
H -2.2671482934 -1.2102287124 0.0375182827  
O -3.3700375337 0.2281979481 -0.0612763230  
H -3.9987545420 0.3932849903 0.6519033169  
H -2.7607118236 0.9971306112 -0.0520298934

#### (H<sub>2</sub>O)<sub>10</sub>

##### H2O-10-1

O -0.8375009073 2.3789661555 -1.2203051098  
H -1.1576957629 3.1170848925 -1.7532273250  
H -1.4922626122 1.6533357423 -1.3496053901  
O 1.8109064916 1.3493089185 -1.3585473426  
H 0.9240965783 1.7568440134 -1.3998428852  
H 2.0630263560 1.4176092969 -0.4161786131  
O -2.4820840102 0.1900809510 -1.2921342643  
H -3.2536356578 0.0518085104 -1.8553876547  
H -1.9186561871 -0.6294757426 -1.4055311437  
O 1.7442480708 -1.2856212936 -1.7565605966  
H 1.7970028356 -0.2915971333 -1.7068309265  
H 2.3331885928 -1.5472567545 -2.4746365178  
O 2.1956962888 1.0869874534 1.4302194743  
H 2.1300979530 0.0931787318 1.4012827712  
H 2.9410683102 1.2857484972 2.0097827426  
O 1.9179967635 -1.5442088153 1.0892563697  
H 1.0170638662 -1.8596716197 1.3064663369  
H 1.9758151883 -1.6397505663 0.1197491644  
O -2.1671829804 -0.0353979536 1.5997349818  
H -2.5035732739 0.0941139377 0.6951985674

H -1.5713245613 0.7395121771 1.7323280887  
O -0.7780076682 -2.2815422427 1.4147803312  
H -1.1192751662 -2.9459060910 2.0256659712  
H -1.3171314969 -1.4549550340 1.5792982835  
O -0.9548023687 -1.9687958585 -1.3905340065  
H -0.0228763463 -1.7891992916 -1.6301821103  
H -0.9098554025 -2.2738415283 -0.4625545906  
O -0.4473844479 2.1201515639 1.6569853402  
H 0.4815535588 1.8201253731 1.6939842439  
H -0.5574520096 2.4225237086 0.7383057377

#### H2O-10-2

O -1.6693940175 -1.3859804045 1.5911674275  
H -2.0192761877 -1.4780996276 0.6871922744  
H -1.6826253326 -0.4096380749 1.7323168014  
O -2.1794357674 -1.2397721279 -1.2707743527  
H -2.2104032358 -0.2588147483 -1.3682677571  
H -2.8952119212 -1.5781875616 -1.8226020655  
O 0.5171168534 -2.1587258548 -1.3923999595  
H -0.4230842449 -1.8974273845 -1.4393742672  
H 0.6511003381 -2.3911522820 -0.4519438496  
O 0.5335932226 2.1533162239 -1.3451947665  
H 1.1314292828 1.4225288779 -1.6032030137  
H 0.7806132047 2.3434658076 -0.4181313189  
O 2.1660541500 -0.1034468151 -1.7623198284  
H 1.5627334428 -0.8961575701 -1.7297287066  
H 2.7910881640 -0.2756792181 -2.4769424659  
O 0.8070335589 -2.2949286543 1.4233164047  
H 0.9450745456 -3.0322664316 2.0302526256  
H -0.1276932896 -1.9775033907 1.5867990006  
O -2.0224972631 1.4914707672 -1.2495421316  
H -1.0637067290 1.7553485267 -1.3645161656  
H -2.5273644427 2.1194427310 -1.7810063683  
O 2.4555418077 -0.0325354240 1.0883015064  
H 1.9495948102 -0.8413416282 1.3081492052  
H 2.5622389697 -0.0800010853 0.1192753634  
O 1.0511030287 2.2029975325 1.4347898353  
H 1.5229390226 2.8260837403 2.0006227955  
H 1.6125046004 1.3799281725 1.4095082388  
O -1.6673919706 1.3695641197 1.6561164629  
H -1.9419493102 1.5585508893 0.7413894281  
H -0.7541052928 1.7140608901 1.6963695633

#### H2O-10-3

O -1.1318909688 -1.9813995641 1.3219540108  
H -1.3013269780 -2.1470558719 0.3733919929  
H -0.1585026326 -2.0009877532 1.4008595193  
O 2.3918557756 0.7741160670 1.1815322610  
H 2.3596845241 0.8661096317 0.1787649564  
H 3.2369977642 1.1557813584 1.4508441206  
O 1.7068724458 -1.8784572586 1.2915439512  
H 2.0498006078 -0.9583230749 1.3791631357  
H 2.2892812377 -2.4283103729 1.8297633736  
O -0.2765467561 2.4985048883 -1.3191979605  
H -0.1948756091 2.5433178667 -0.3277147204  
H -0.3700801292 3.4114215600 -1.6183742344  
O -2.1619769663 0.4500048516 1.6909930642



H -1.7959445393 -0.4759386384 1.6502603493  
H -2.8128873033 0.4440010875 2.4033144104  
O -0.0460837214 2.2760789268 1.3363474256  
H 0.7809728918 1.7762555790 1.4748162468  
H -0.7611135840 1.6656460085 1.6075053041  
O 1.3260309776 -1.7515545481 -1.6068641265  
H 0.3587683003 -1.8631968927 -1.6865561776  
H 1.5137947762 -2.0050253332 -0.6861660938  
O -1.5105449717 -1.8988009752 -1.4826975746  
H -1.8671938743 -0.9690388612 -1.4621800868  
H -2.0907003523 -2.3903768680 -2.0766623541  
O -2.3828087708 0.6022333539 -1.1577310643  
H -2.4902731711 0.6644610264 -0.1892677839  
H -1.7206330757 1.2922512919 -1.3617994860  
O 2.0860010413 0.8914753039 -1.4209909829  
H 1.7980756578 -0.0265007839 -1.6364740014  
H 1.3048174153 1.4517880034 -1.5897774006

#### H2O-10-6

O 0.9105877098 -1.2116790126 2.1298482872  
H 0.8779085857 -1.4931066552 3.0523122373  
H 0.8858488321 -0.2123839009 2.1430425122  
O 1.0034838074 -1.4539598315 -1.9583065335  
H 1.0292519189 -1.8458361800 -2.8397580667  
H 0.9891605086 -0.4632138878 -2.0954521205  
O -3.6952204776 -1.3009963692 0.1167354973  
H -4.1290399810 -1.9565504377 -0.4424354192  
H -2.7396215384 -1.5149508539 0.0694363420  
O -0.9280908452 -1.4741330314 0.0518072298  
H -0.3272139229 -1.6431306701 -0.7039197154  
H -0.3629343673 -1.5575843629 0.8483379811  
O 2.9437023058 -1.2483705544 0.1269905475  
H 2.3626757884 -1.4117598880 0.8946208817  
H 2.3944927240 -1.5020325683 -0.6395662267  
O 0.9593347136 1.2005365348 -2.0063675755  
H 1.7123879174 1.4698445154 -1.4462859994  
H 0.1705430454 1.4318865996 -1.4722613103  
O -3.8899052426 1.4592047348 -0.1816463980  
H -4.3950662743 1.8227071283 0.5561585258  
H -3.9640799964 0.4853507575 -0.0798130617  
O 3.0093720859 1.4364392067 -0.0331570576  
H 3.1255117015 0.4514378091 0.0290035027  
H 3.8985162794 1.8110823583 -0.0355473893  
O 0.8584401970 1.4311789679 1.8417828886  
H 0.1045592378 1.5873845458 1.2346244504  
H 1.6444309539 1.6333021870 1.2989085745  
O -1.1147649197 1.3281990909 -0.1361476228  
H -1.1367947274 0.3492205542 -0.0721258473  
H -2.0640160180 1.5771231586 -0.1592191094

#### H2O-10-t8

O 0.0762972594 -1.6611270306 -0.2294472969  
H -0.4493688853 -2.4513284402 -0.4048363549  
H -0.0332393294 -1.4906783984 0.7311142083  
O -2.7547248021 1.9450841298 3.4830752764  
H -2.3755641120 1.8780937720 2.5833723034

|   |               |               |               |
|---|---------------|---------------|---------------|
| H | -2.6466490170 | 1.0482089319  | 3.8505374398  |
| O | -0.7505132535 | 0.7713699493  | -1.3109275604 |
| H | -0.1166806253 | 1.0896321649  | -1.9652391735 |
| H | -0.4267335655 | -0.1196081847 | -1.0525030888 |
| O | -1.7829273664 | -0.5343257362 | 4.6186862501  |
| H | -1.0994190917 | -0.0467631638 | 5.1556948038  |
| H | -2.1895908904 | -1.1709905105 | 5.2190114544  |
| O | 0.1206401660  | 0.9516586219  | 5.7653619445  |
| H | 0.8953895539  | 0.8409329710  | 5.1820386073  |
| H | -0.1674990681 | 1.8726384309  | 5.6057845762  |
| O | 1.9277822510  | 0.5930723802  | 3.5829502642  |
| H | 2.7842028960  | 0.1606732361  | 3.4784469281  |
| H | 1.2797257193  | 0.0381159855  | 3.0826696808  |
| O | -0.9225123433 | 3.3924199216  | 4.7936857749  |
| H | -1.6891037850 | 2.9472623193  | 4.3395383614  |
| H | -1.2880645632 | 4.1700642726  | 5.2326542365  |
| O | 0.8692819064  | 3.1025639301  | 2.5782396440  |
| H | 1.4216592121  | 2.3752681485  | 2.9185227823  |
| H | 0.3593571238  | 3.3922601577  | 3.3589004905  |
| O | -0.1712736984 | -0.6196385334 | 2.3315522444  |
| H | -0.5518396827 | 0.2123239652  | 1.9418273560  |
| H | -0.7764580573 | -0.8276400650 | 3.0727648744  |
| O | -1.0640460163 | 1.6926692543  | 1.2687500222  |
| H | -0.9704555216 | 1.5732773100  | 0.2988023827  |
| H | -0.3396724006 | 2.2925092983  | 1.5699787683  |
